# Supplementary material
Source: publisher figshare collection journal article supplement (https://sage.figshare.com/ndownloader/files/23700417)
Supplement: Supplementary file 1 [file 23700417]

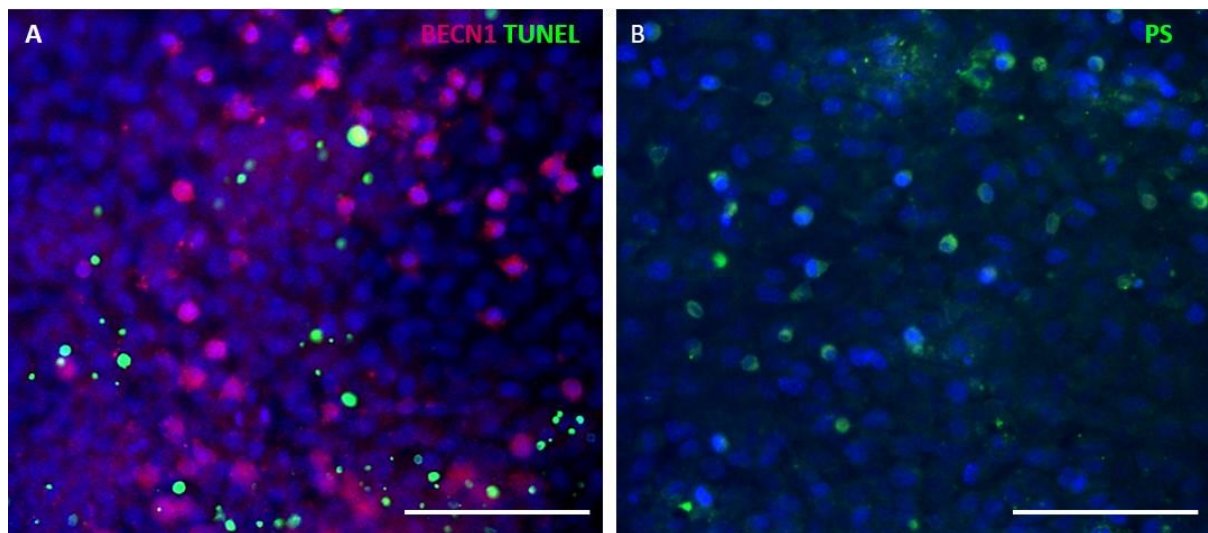

**Supplementary figure 1:** Double staining of Beclin-1 (red) and TUNEL assay (green) showing non-overlapping pattern in six days cultivated micromass cultures (A). Detection of phosphatidylserine (green) in six days cultivated micromass cultures (B). Nuclei in blue (DAPI). Scale bar = 100  $\mu$ m.
